# Supplementary material for: Perilla frutescens Leaf Alters the Rumen Microbial Community of Lactating Dairy Cows
Source: PubMed Central journal article supplement (PMC6921060; doi:10.3390/microorganisms7110562), 2019-11-13
Supplement: microorganisms-07-00562-s001.pdf [file microorganisms-07-00562-s001.pdf]

**Table S1.** Ingredients and chemical composition of the diets

| Item                                         | Diet  |
|----------------------------------------------|-------|
| Ingredients, g/kg of DM                      |       |
| Corn grain                                   | 141.3 |
| Steam-flaked corn                            | 101.2 |
| Bran                                         | 7.40  |
| Soybean meal                                 | 94.6  |
| Extruded Soybean                             | 31.2  |
| Rapeseed meal                                | 23.1  |
| Sugar beet meal                              | 64.4  |
| DDGS                                         | 23.4  |
| Corn silage                                  | 243.4 |
| Alfalfa hay                                  | 160.2 |
| Oat hay                                      | 47.4  |
| Premix concentrate <sup>a</sup>              | 62.3  |
| Chemical composition, g/kg of DM             |       |
| unless noted                                 |       |
| Organic matter                               | 927.1 |
| Crude protein                                | 174.0 |
| Neutral detergent fiber                      | 284.2 |
| Acid detergent fiber                         | 156.4 |
| Ether extracts                               | 21.8  |
| NE <sub>L</sub> <sup>b</sup> , Mcal/kg of DM | 1.70  |

<sup>a</sup>Formulated to contain (per kilogram of premix concentrate) 365 g of soybean meal; 182.5 g of fat powder; 73 g of CaHCO<sub>3</sub>; 146 g of NaHCO<sub>3</sub>; 92 g of stone powder; 87.6 g of NaCl; 36.5 g of MgO<sub>2</sub>; 30 mg of Se; 15 mg of Co; 385 mg of Cu; 61 mg of Fe; 1065.5 mg of Mn; 58 mg of I; 2459 mg of Zn; 730,000 IU of vitamin A; 1750,000 IU of vitamin D; 458 IU of vitamin E.

<sup>b</sup>Calculated based on Ministry of Agriculture of P. R. China recommendations [1].

**Table S2.** The relative proportion of bioactive compounds in *Perilla frutescens* leaf (PFL) using UHPLC-QTOF-MS

| Bioactive compounds                        | Proportion, % |
|--------------------------------------------|---------------|
| Clareolide                                 | 13.10         |
| Betaine                                    | 8.26          |
| Sucrose                                    | 7.48          |
| Scutellarin                                | 6.15          |
| Apigenin                                   | 5.24          |
| L-Valine                                   | 4.79          |
| Caffeic acid                               | 4.69          |
| 2-Pyrrolidinecarboxylic acid               | 3.56          |
| L-Phenylalanine                            | 2.88          |
| L-Tryptophan                               | 2.61          |
| Adenosine                                  | 2.38          |
| Luteolin 7-glucuronide                     | 2.25          |
| 5-Acetylsalicylic acid                     | 2.20          |
| Citric acid                                | 2.03          |
| L-Leucine                                  | 1.85          |
| Stachydrine                                | 1.61          |
| Apigenin 7-O-glucuronide                   | 1.54          |
| Oroxylin A                                 | 1.48          |
| Adenine                                    | 1.40          |
| 7-Hydroxycoumarin                          | 1.24          |
| Esculetin                                  | 1.11          |
| Luteolin                                   | 1.04          |
| Orsellinic acid                            | 0.94          |
| Cynaroside                                 | 0.87          |
| Chrysin                                    | 0.71          |
| Vicenin II                                 | 0.66          |
| Kaempferol-7-O- $\beta$ -D-glucopyranoside | 0.59          |

|                               |      |
|-------------------------------|------|
| Gossypol-acetic acid          | 0.59 |
| Baicalin                      | 0.58 |
| L-Tyrosine                    | 0.57 |
| L(-)-Carnitine                | 0.48 |
| Manninotriose                 | 0.48 |
| $\alpha$ -Cyperone            | 0.47 |
| Nicotinic acid                | 0.46 |
| p-Hydroxybenzaldehyde         | 0.46 |
| Rosmarinic acid               | 0.44 |
| Nicotinamide                  | 0.41 |
| Dihydroartemisinic acid       | 0.41 |
| Kaempferol                    | 0.39 |
| Isovitexin                    | 0.39 |
| Azelaic acid                  | 0.39 |
| Hydroxygenkwanin              | 0.38 |
| Uridine                       | 0.38 |
| Salicylic acid                | 0.37 |
| Protocatechualdehyde          | 0.36 |
| Senkyunolide                  | 0.35 |
| Danshensu                     | 0.32 |
| 5-Hydroxymethylfurfural       | 0.30 |
| Gentisic acid                 | 0.28 |
| Maleic acid                   | 0.27 |
| Guanosine                     | 0.25 |
| Pinocembrin                   | 0.25 |
| Glabrolide                    | 0.24 |
| L-Glutamic acid               | 0.23 |
| 18 $\beta$ -Glycyrrhetic Acid | 0.22 |
| Scutellarein                  | 0.21 |

|                                       |      |
|---------------------------------------|------|
| $\beta$ -Elemonic acid                | 0.21 |
| Ligustilide                           | 0.21 |
| 3-n-Butylphthalide                    | 0.20 |
| Calcium pantothenate                  | 0.20 |
| Oleanonic acid                        | 0.19 |
| 6-Shogaol                             | 0.18 |
| Quillaic acid                         | 0.18 |
| Hispidulin                            | 0.18 |
| Vitexin                               | 0.18 |
| 3,5-Dimethoxy-4-hydroxybenzaldehyde   | 0.17 |
| Curcumenol                            | 0.16 |
| Germacrone                            | 0.15 |
| Perillene                             | 0.15 |
| $\alpha$ -Linolenic acid              | 0.15 |
| Ursonic acid                          | 0.15 |
| 1-Caffeoylquinic acid                 | 0.14 |
| Camphor                               | 0.14 |
| Pectolarigenin                        | 0.14 |
| (+)-Nootkatone                        | 0.13 |
| 4-Hydroxybenzoic acid                 | 0.13 |
| Quercetin 3-O- $\beta$ -D-Glucuronide | 0.13 |
| Ursolic acid                          | 0.13 |
| Cytidine                              | 0.12 |
| Astragalin                            | 0.12 |
| p-Hydroxy-cinnamic acid               | 0.12 |
| Methyl rosmarinate                    | 0.11 |
| Diosmetin                             | 0.11 |
| Propylparaben                         | 0.10 |
| Vanillin                              | 0.10 |

|                            |      |
|----------------------------|------|
| 6-Gingerol                 | 0.10 |
| Isoguanosine               | 0.09 |
| Curcumol                   | 0.09 |
| Abscisic acid              | 0.08 |
| 7,8-Dihydroxycoumarin      | 0.08 |
| Sec-O-Glucosylhamaudol     | 0.08 |
| Aurantio-obtusin           | 0.08 |
| Artemisinic acid           | 0.07 |
| Formononetin               | 0.07 |
| 3,4-Dihydroxyphenylethanol | 0.07 |
| Genkwanin                  | 0.07 |
| Amygdalin                  | 0.07 |
| 2-Adamantanone             | 0.07 |
| Ferulic acid               | 0.07 |
| Arglabin                   | 0.05 |
| Sinapic acid               | 0.05 |
| Scoparone                  | 0.05 |
| Protocatechuic acid        | 0.05 |
| Pinoresinol 4-O-glucoside  | 0.05 |
| Dehydroandrographolide     | 0.04 |
| Genistein                  | 0.04 |
| Isoquercitrin              | 0.04 |
| Atractylodin               | 0.04 |
| Phenethyl caffeate         | 0.04 |
| p-Coumaric acid            | 0.04 |
| Naringenin chalcone        | 0.04 |
| Lupenone                   | 0.04 |
| Quinic acid                | 0.04 |
| Asiatic acid               | 0.04 |

|                 |      |
|-----------------|------|
| Isoferulic acid | 0.03 |
| Ethyl caffeate  | 0.03 |
| Citropten       | 0.03 |
| Artemisinin     | 0.03 |
| Lovastatin      | 0.03 |
| Guanine         | 0.03 |
| (+)-Pinoresinol | 0.03 |
| Eriodictyol     | 0.02 |

---

## **Reference**

1. MOA (Ministry of Agriculture of P.R. China). 2004. Feeding Standard of Dairy Cattle (NY/T 34–2004). MOA, Beijing, China.
